# Supplementary material for: Brusatol Inhibits Tumor Growth and Increases the Efficacy of Cabergoline against Pituitary Adenomas
Source: Hindawi journal article supplement (doi:10.1155/2021/6696015), 2021-01-01
Supplement: f1 [file 6696015.f1.pdf]

Patients' information of pituitary tumors

| Patient Number | Gender | Age | Tumor type | Tumor size (mm) | Knosp Grade | Prolactin Levels (ng/ml) | GH level(ng/ml) |
|----------------|--------|-----|------------|-----------------|-------------|--------------------------|-----------------|
| 1              | M      | 45  | NFPA       | 40*36*26        | III         | 8.39                     | 0.06            |
| 2              | F      | 48  | NFPA       | 40*20*20        | IV          | 1.37                     | 0.33            |
| 3              | M      | 41  | NFPA       | 23*22*18        | I           | 5.92                     | 0.05            |
| 4              | M      | 72  | NFPA       | 20*25*14        | II          | 6.69                     | 0.25            |
| 5              | F      | 40  | GHoma      | 19*11*13        | II          | 15.62                    | 17.56           |
| 6              | F      | 22  | PRLoma     | 26*22*20        | II          | 387.01                   | 0.65            |

F: Femal; M: Male; NFPA: non-functional pituitary adenoma; GHoma: growth hormone secreting pituitary adenoma; PRLoma: Prolactinoma;
